# Supplementary material for: Attitudes Towards the Use of Routine Outcome Monitoring of Psychological Therapies Among Mental Health Providers: The EBPAS–ROM
Source: Springer Nature journal article supplement (doi:10.1007/s10488-019-00968-5), 2019-08-28
Supplement: MOESM1 [file 17138250]

The EBPAS-ROM assesses mental health provider attitudes towards systematically use of routine outcome monitoring (ROM), to get feedback on patient´s problems and changes throughout the course of treatment. Routine outcome measures refer to standardized instruments assessing mental health status, in which health personnel or patients themselves, report their current status regarding common mental health issues. The instruments can be administered either on paper or through web- or software support systems

Items are presented on a 5-point Likert scale ranging from 0 “Not at All” to 4 “To a Very Great Extent”.

**Background**

The instrument is rephrased and adapted from the *Evidence-based Practice Attitude Scale (EBPAS) – 50 and 36* item versions (see references below), assessing mental health provider attitudes toward adoption of evidence based interventions in mental health and social service settings. The EBPAS-ROM has been validated in Norwegian language (manuscript submitted). EBPAS-ROM measures 9 domains corresponding to 9 out of 12 EBPAS subscales.

**References**

Aarons, G.A. (2004). Mental health provider attitudes toward adoption of evidence-based practice: the Evidence Based Practice Attitude Scale (EBPAS*).* *Mental Health Service Research,* *6*(2), 61-74.

Aarons, G.A., et al. (2012). Expanding the domains of attitudes towards evidence-based practice:

the evidence based practice attitude scale-50*.* *Administration and Policy in Mental Health and Mental Health Services Research, 39*(5), 331-340.

Rye, M., Torres, E.M., Friborg, O., Skre, I., & Aarons, Gregory A. (2017). The Evidence based

Practice Attitude Scale- 36 (EBPAS-36): a brief and pragmatic measure of attitudes to

evidence-based practice validated in US and Norwegian samples. *Implementation Science*,

12:44.

Rye, M., Rognmo, K., Aarons, G. A., & Skre, I. (this article). Attitudes towards the use of routine outcome

monitoring of psychological therapies among mental health providers: The EBPAS-ROM. doi:10.1007/s10488-019-00968-5

For more information, contact:

Marte Rye: marte.rye@uit.no

The following questions concerns your attitudes towards systematically using routine outcome monitoring (ROM), to get feedback on patient´s problems and changes throughout the course of treatment. Routine outcome measures refer to standardized instruments assessing mental health status, in which health personnel or patients themselves, report their current status regarding common mental health issues. The instruments can be administered either on paper or through web- or software support systems

# Please indicate the extent to which you agree with each item using the below scale.

| **0** | **1** | **2** | **3** | **4** |
| --- | --- | --- | --- | --- |
| **Not at all** | **Slight extent** | **Moderate extent** | **Great extent** | **Very great extent** |

*For questions 1-9: If you received training in the use of ROM, how likely would you be to adopt it if:*

1. it “made sense” to you?................................................................................................................. 0 1 2 3 4
2. it was required by your supervisor? …………………………………………………………….. 0 1 2 3 4
3. it was required by your agency? ………………………………………………………………….0 1 2 3 4
4. it was required by your state? ……………………………………………………………………0 1 2 3 4
5. it was being used by colleagues who were happy with it? ………………………………………0 1 2 3 4
6. you felt you had enough training to use it correctly? …………………………………………....0 1 2 3 4
7. your clients wanted it? ………………………………………………………………………… 0 1 2 3 4
8. you had a say in how you would use ROM …………………………………………………….. 0 1 2 3 4
9. the use of ROM fit with your clinical approach ..0 1 2 3 4

*For questions 10-18: Circle the number indicating the extent to which you agree with each item using the following scale:*

1. the use of ROM detracts from truly connecting with your clients 0 1 2 3 4
2. ROM is not useful for clients with multiple problems ………………………………………… 0 1 2 3 4
3. Outcome measures are to narrowly focused 0 1 2 3 4
4. I prefer to work on my own without oversight. 0 1 2 3 4
5. I do not want anyone looking over my shoulder while I provide services 0 1 2 3 4
6. My work does not need to be monitored. 0 1 2 3 4
7. I don’t have time to learn anything new 0 1 2 3 4
8. I don’t know how to fit use of ROM into my administrative work 0 1 2 3 4
9. The use of ROM will cause too much paperwork …………………………………………… 0 1 2 3 4

| **0** | **1** | **2** | **3** | **4** |
| --- | --- | --- | --- | --- |
| **Not at all** | **Slight extent** | **Moderate extent** | **Great extent** | **Very great extent** |

*For questions 19-27: Circle the number indicating the extent to which you agree with each item using the following scale:*

1. Learning to use ROM will help me keep my job 0 1 2 3 4
2. Learning to use ROM will help me get a new job 0 1 2 3 4
3. Learning to use ROM will make it easier to find work 0 1 2 3 4
4. I would learn to use ROM if continuing education credits were provided. 0 1 2 3 4
5. I would learn to use ROM if training were provided 0 1 2 3 4
6. I would learn to use ROM if ongoing support was provided 0 1 2 3 4
7. I enjoy getting feedback on my job performance 0 1 2 3 4
8. Getting feedback helps me to be a better therapist/case manager ……………………………..0 1 2 3 4
9. Getting supervision helps me to be a better therapist/case manager…………………………...0 1 2 3 4
